# Supplementary material
Source: PubMed Central journal article supplement (PMC4083631)
Supplement: NIHMS596189-supplement-supplement_1.pdf [file NIHMS596189-supplement-supplement_1.pdf]

## **SUPPLEMENTAL MATERIAL**

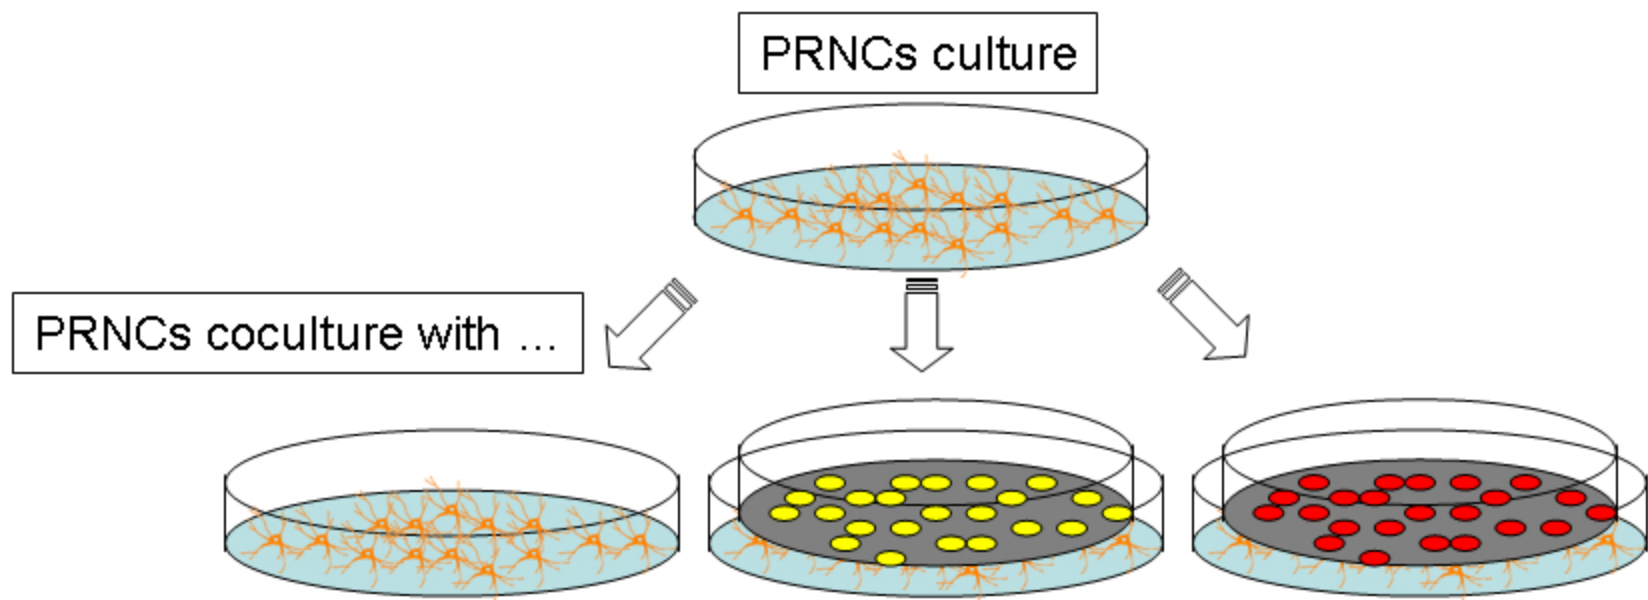

| Medium                                  | Single culture | Coculture with fibroblast | Coculture with HEN6 |
|-----------------------------------------|----------------|---------------------------|---------------------|
| DMEM                                    | Group A        | Group G                   | Group M             |
| DMEM with VEGF (0.5ng/ml)               | Group B        | Group H                   | Group N             |
| DMEM with VEGF (5.0ng/ml)               | Group C        | Group I                   | Group O             |
| DMEM with anti-VEGF                     | Group D        | Group J                   | Group P             |
| DMEM with VEGF (0.5ng/ml) and anti-VEGF | Group E        | Group K                   | Group Q             |
| DMEM with VEGF (5.0ng/ml) and anti-VEGF | Group F        | Group L                   | Group R             |

Supplemental Material Figure 1

# HEN6 graft survival

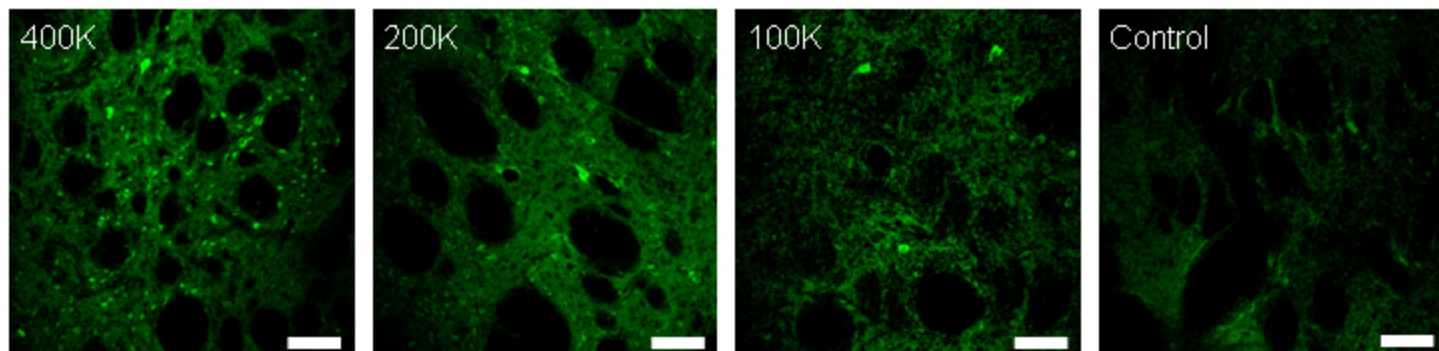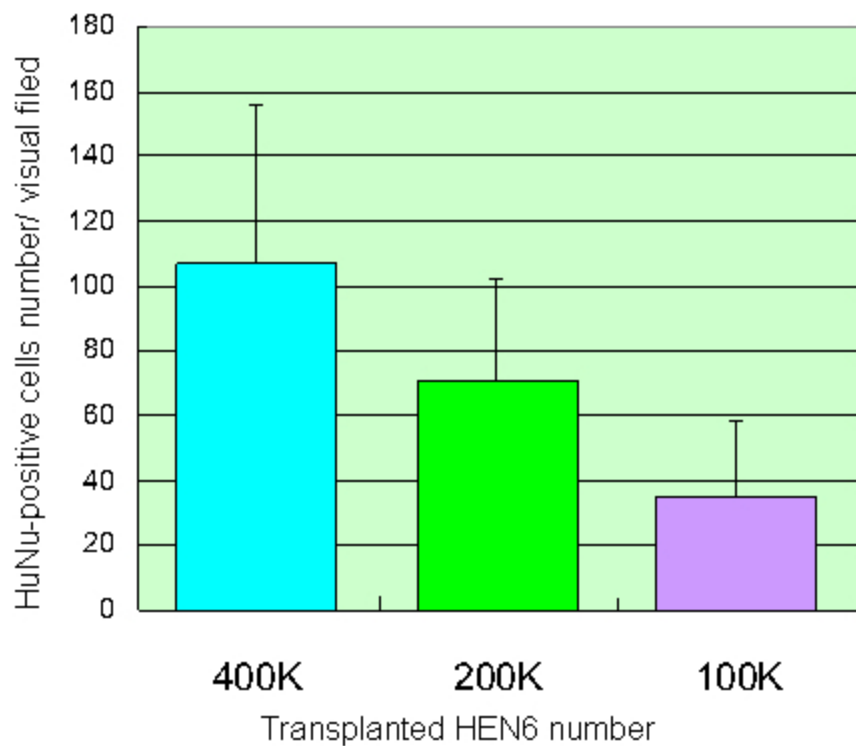

## **Supplemental Figure Legends**

Supplemental Figure 1. **Culture conditions for Primary rat neuronal cells (PRNCs).**

PRNCs were either singly cultured or co-cultured with fibroblasts or HEN6. Additionally, PRNCs were grown under the routine DMEM culture condition or supplemented with VEGF, anti-VEGF, or combination of both.

Supplemental Figure 2. **HEN6 graft survival.** Dose-dependent graft survival of

transplanted HEN6 was detected. However, the percent graft survival was comparable and not significantly different across all transplanted animals.
